# Supplementary material
Source: PubMed Central journal article supplement (PMC3719586)
Supplement: IAI.00219-13_zii999090260so1.pdf [file IAI.00219-13_zii999090260so1.pdf]

S1

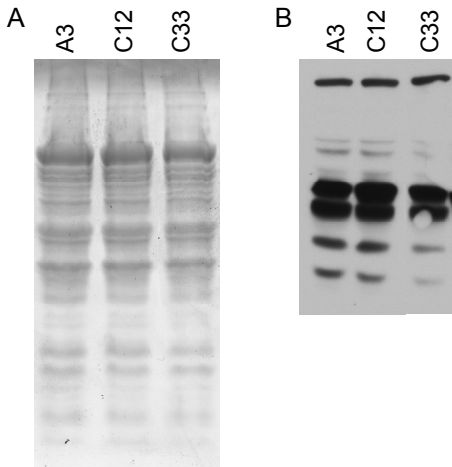

Supplementary Figure 1  
Protein profile analysis A.) Coomassie stained gel illustrating the protein profiles of A3, C12 and C33 grown in BSKII. B.) Western blot displaying the antigens produced by A3, C12, and C33 detected using pooled serum derived from mice infected with A3.

**Supplementary Table 1 - Primers and Probes used in this study**

| Primer # | Designation                     | Sequence (5'-3' direction)                                 | Reference    |
|----------|---------------------------------|------------------------------------------------------------|--------------|
| 1        | Aut 28-3 NheI-5'                | <u>TTGCTAGCGTTGGTTGGCATTGATTAACAGATACCACTAGATTTTTGAT</u> * | This study   |
| 2        | Aut 28-3 NheI-3'                | <u>AAGCTAGCTTATAATATATTATACAATTTTAATCAAGAGCTCACTTTTA</u> * | This study   |
| 3        | 5' Gent ( <i>aacC1</i> ) Screen | ATGTTACGCAGCAGCAACGATGTTACGCAGCAGG                         | This study   |
| 4        | 3' Gent ( <i>aacC1</i> ) Screen | TTAGGTGGCGGTACTTGGGTGCATATCAAAGTGCATCACTTCTTC              | This study   |
| 5        | BBH13-F                         | ATGAAAGCAGTTTTGGCAAC                                       | Ojaimi C     |
| 6        | BBH13-R                         | TTATTCTGTTGCTCACCTTGAG                                     | Ojaimi C     |
| 7        | BBH41-F                         | TGCTGAAAGAGAAAAGGAGTTC                                     | Ojaimi C     |
| 8        | BBH41-R                         | TTTAAAGGACAGTTGGAATCCG                                     | Ojaimi C     |
| 9        | BBH18-5'                        | CTGAAAATGAAGGAGAAGCGGGTGG                                  | Akins PNAS   |
| 10       | BBH18-3'                        | TAGGCTAATAACCAATTCGTACAAAT                                 | Akins PNAS   |
| 12       | BBH17-F                         | TTGATATGCCACCATTATAACACT                                   | Ojaimi C     |
| 13       | BBH17-R                         | CTTATCTTTGGTAATTAATAAAAAAGACTTTTTAAAATTTAAAAG              | Ojaimi C     |
| 14       | BBH08-F                         | ATGGTTGGTGTTTTTATAAAAAGCT                                  | Ojaimi C     |
| 15       | BBH08-R                         | CATATTAATTGCTAAATCATCTTCTTTTG                              | Ojaimi C     |
| 16       | BBB19-F                         | TAATTCAGGGAAAGATGGGA                                       | Ojaimi C     |
| 17       | BBB19-R                         | AGGTTTTTTTTGGACTTTCTGCCACAACAGGG                           | Ojaimi C     |
|          |                                 |                                                            |              |
|          | <b>qPCR Primers and Probes</b>  |                                                            |              |
| 18       | <i>flaB</i> -qPCR 5'            | CAGCTAATGTTGCAAATCTTTTCTCT                                 | Jewett et al |
| 19       | <i>flaB</i> -qPCR 3'            | CCTTCCTGTTGAACACCCTCTT                                     | Jewett et al |
| 20       | <i>flaB</i> probe               | ACTGCTCAGGCTGCACCGGT                                       | Jewett et al |
| 21       | <i>nid</i> -qPCR 5'             | TCCCCAGGCCATCGGT                                           | Jewett et al |
| 22       | <i>nid</i> -qPCR 3'             | CACCCAGCTTCGGCTCAGTA                                       | Jewett et al |
| 23       | <i>nid</i> -probe               | CGCCTTTCCTGGCTGACTTGGACA                                   | Jewett et al |
| 24       | <i>bbh35</i> -qPCR 5'           | CATGTGGGATTGTGCGTTATT                                      | This study   |
| 25       | <i>bbh35</i> -qPCR 3'           | GCAGCCCTTTTGCTATCTTTT                                      | This study   |
| 26       | <i>bbh35</i> -probe             | TGGCCCCTCCTATTCTGTAAATATCGCA                               | This study   |

\* Relevant restriction enzyme recognition sequences have been underlined

**Supplementary Table 1 - Primers and Probes used in this study**

## Supplementary Table 2.

### **Co-infection Experiment 1 - Determination of the ratio and competitive index of C12 to A3 spirochetes from tissue isolates**

#### **Co-injected Mice**

|          | <b><u>Ear<sup>a</sup></u></b> | <b><u>Bladder<sup>a</sup></u></b> | <b><u>Joint<sup>a</sup></u></b> | <b><u>Total<sup>a</sup></u></b> | <b><u>Ip28-3<sup>+</sup>:Wild-type<sup>b</sup></u></b> | <b><u>Competitive Index (CI)</u></b> |
|----------|-------------------------------|-----------------------------------|---------------------------------|---------------------------------|--------------------------------------------------------|--------------------------------------|
| Mouse #1 | 8/10                          | 2/5                               | 2/2                             | 12/17                           | 1:2.4                                                  |                                      |
| Mouse #2 | 10/10                         | 8/10                              | 8/10                            | 26/30                           | 1:6.5                                                  |                                      |
| Mouse #3 | 10/10                         | 10/10                             | 5/5                             | 25/25                           | 0:1                                                    |                                      |
| Mouse #4 | 8/8                           | 7/10                              | 10/10                           | 25/28                           | 1:8.3                                                  |                                      |
|          |                               |                                   |                                 | 88/100                          | 1:7.3                                                  | CI = 0.14 <sup>c</sup>               |

**a.** Ip28-3 positive (wild-type) spirochetes/Total number of colonies screened determined from tissue isolates 4 weeks post inoculation

**b.** The ratio of C12:A3 spirochetes in infected mouse tissues was determined using the cumulative tissue isolate data

**c.** Competitive Index (CI) was calculated as described in Materials and Methods

**Supplementary Table 3.**

**Co-infection Experiment 2- Screening results for the presence of lp28-3 in spirochetes isolated from tissues**

| <b><u>Coinjected Mice</u></b> | <b><u>Inoculum<sup>a</sup> Wild-type/Total Screened<sup>b</sup></u></b> | <b><u>2 Week<sup>c</sup></u></b> | <b><u>4 Week<sup>c</sup></u></b> | <b><u>8 Week Isolates<sup>d</sup></u></b> | <b><u>Larval Tick Isolates<sup>e</sup></u></b> |
|-------------------------------|-------------------------------------------------------------------------|----------------------------------|----------------------------------|-------------------------------------------|------------------------------------------------|
| Mouse #1                      | 35/63                                                                   | 31/35                            | 35/35                            | 38/52                                     | 79/84 (6)                                      |
| Mouse #2                      | 35/63                                                                   | 35/35                            | ND <sup>f</sup>                  | 0/20                                      | 8/8 (3)                                        |
| Mouse #3                      | 35/63                                                                   | 31/35                            | 43/47                            | 18/18                                     | 17/17 (2)                                      |
| Mouse #4                      | 35/63                                                                   | 18/35                            | ND <sup>f</sup>                  | ND <sup>f</sup>                           | 11/68 (6)                                      |
| Mouse #5                      | 35/63                                                                   | 32/35                            | 28/32                            | 20/24                                     | 81/88 (6)                                      |

- a. Mice were injected with a  $1 \times 10^4$  spirochetes of a mixed inoculum of A3 and C33
- b. lp28-3 positive (wild-type) spirochetes/total number of colonies screened
- c. lp28-3 positive (wild-type) spirochetes/total number of colonies screened from spirochetes isolated from ear punch biopsies (EP)
- d. lp28-3 positive (wild-type) spirochetes/total number of colonies screened from spirochetes isolated from ear, bladder and tibiotarsal joint tissues (E,B,J)
- e. lp28-3 positive (wild-type) spirochetes/total number of colonies screened from spirochetes isolated from larval ticks; the number in brackets represents the number of larval ticks screened
- f. ND=Not determined due to contamination of culture

## Supplementary Table 4 - Determination of the 50% Infectious Dose

### *B. burgdorferi* Strain: A3 (Wild-type)

| <u>Dose<sup>a</sup></u> | <u>Infected Mice/Total<sup>b</sup></u> | <u>% Infected</u> |                                              |
|-------------------------|----------------------------------------|-------------------|----------------------------------------------|
| 1x10 <sup>2</sup>       | 2/5                                    | 40                | <b>ID 50<sup>c</sup>=1.44x10<sup>2</sup></b> |
| 1x10 <sup>3</sup>       | 5/5                                    | 100               |                                              |
| 1x10 <sup>4</sup>       | 5/5                                    | 100               |                                              |
| 1x10 <sup>5</sup>       | 5/5                                    | 100               |                                              |

### *B. burgdorferi* Strain: C12 (lp28-3-deficient)

| <u>Dose<sup>a</sup></u> | <u>Infected Mice/Total<sup>b</sup></u> | <u>% Infected</u> |                                              |
|-------------------------|----------------------------------------|-------------------|----------------------------------------------|
| 1x10 <sup>2</sup>       | 1/5                                    | 16.7              | <b>ID 50<sup>c</sup>=2.51x10<sup>2</sup></b> |
| 1x10 <sup>3</sup>       | 4/5                                    | 83.3              |                                              |
| 1x10 <sup>4</sup>       | 5/5                                    | 100               |                                              |
| 1x10 <sup>5</sup>       | 5/5                                    | 100               |                                              |
| 1x10 <sup>6</sup>       | 5/5                                    | 100               |                                              |

**a.** Mice were inoculated by intraperitoneal and subcutaneous injection

**b.** Infection status was determined 4 weeks post-inoculation by the ability to isolate spirochetes from the ear, bladder, and tibiotarsal tissues; isolates were recovered from all tissues tested from infected mice

**c.** The ID50 was determined as described in (45)
